# Supplementary material for: Formation of oxygen protective layer on monolayer MoS 2 via low energy electron irradiation
Source: Royal Society of Chemistry journal article supplement (doi:10.1039/d4ra03362k), 2024-01-01
Supplement: d4ra03362k1.pdf [file d4ra03362k1.pdf]

Supporting Information

## Formation of oxygen protective layer on monolayer MoS<sub>2</sub> via low energy electron irradiation

Aissara Rasrit,<sup>a</sup> Manunya Tapakidareekul,<sup>a</sup> Kritsana Saego,<sup>a</sup> Worawat Meevasana,<sup>a</sup> and Sorawis Sangtawesin<sup>\*a</sup>

<sup>a</sup> School of Physics, Suranaree University of Technology, Nakhon Ratchasima 30000, Thailand.

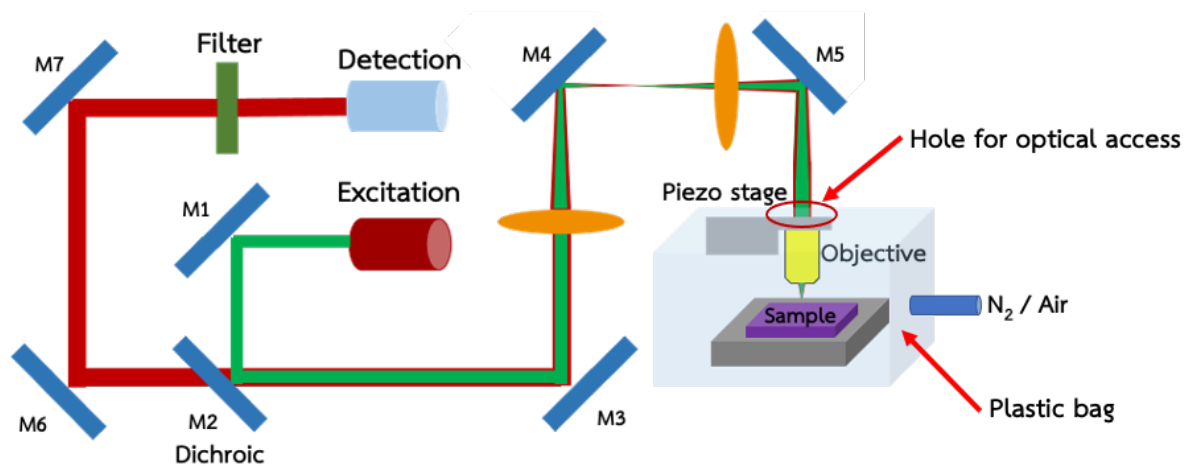

**Figure S1.** Diagram of a confocal microscope setup under N<sub>2</sub> and ambient atmosphere.

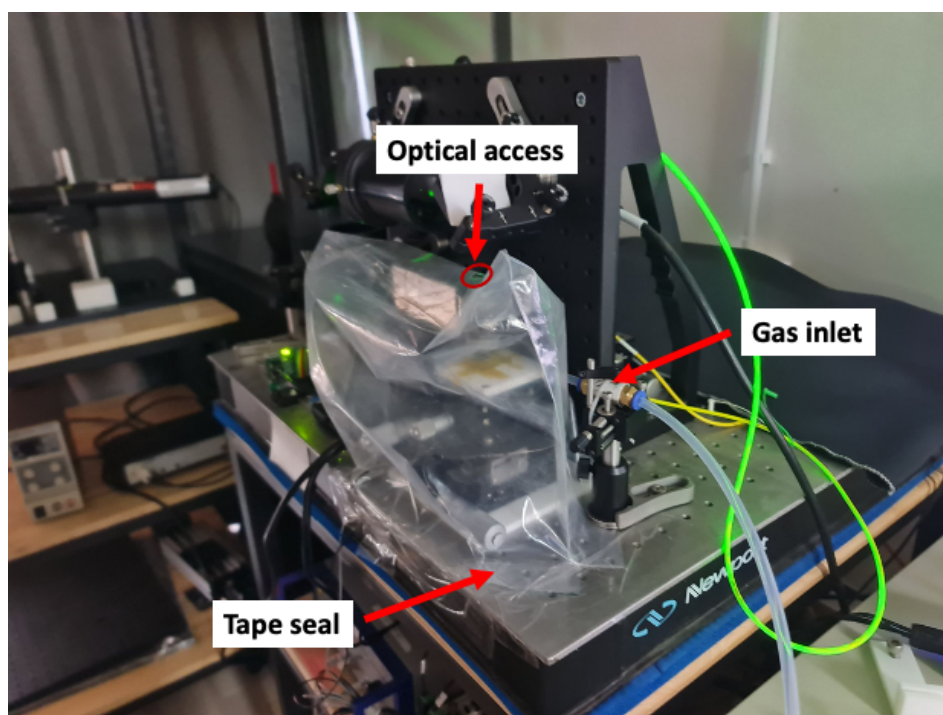

**Figure S2.** The experiment setup.

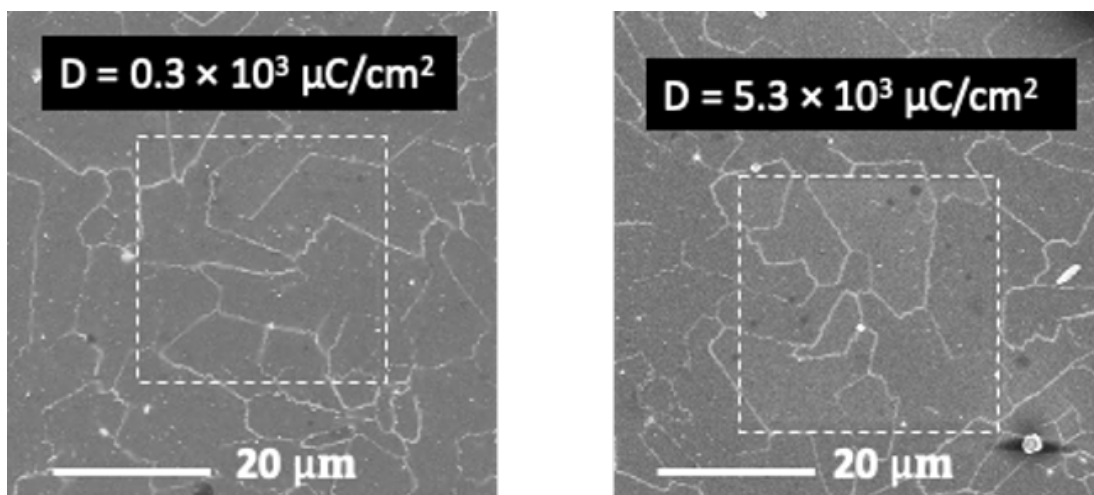

**Figure S3.** The SEM images with different electron irradiation doses in 2 regions.

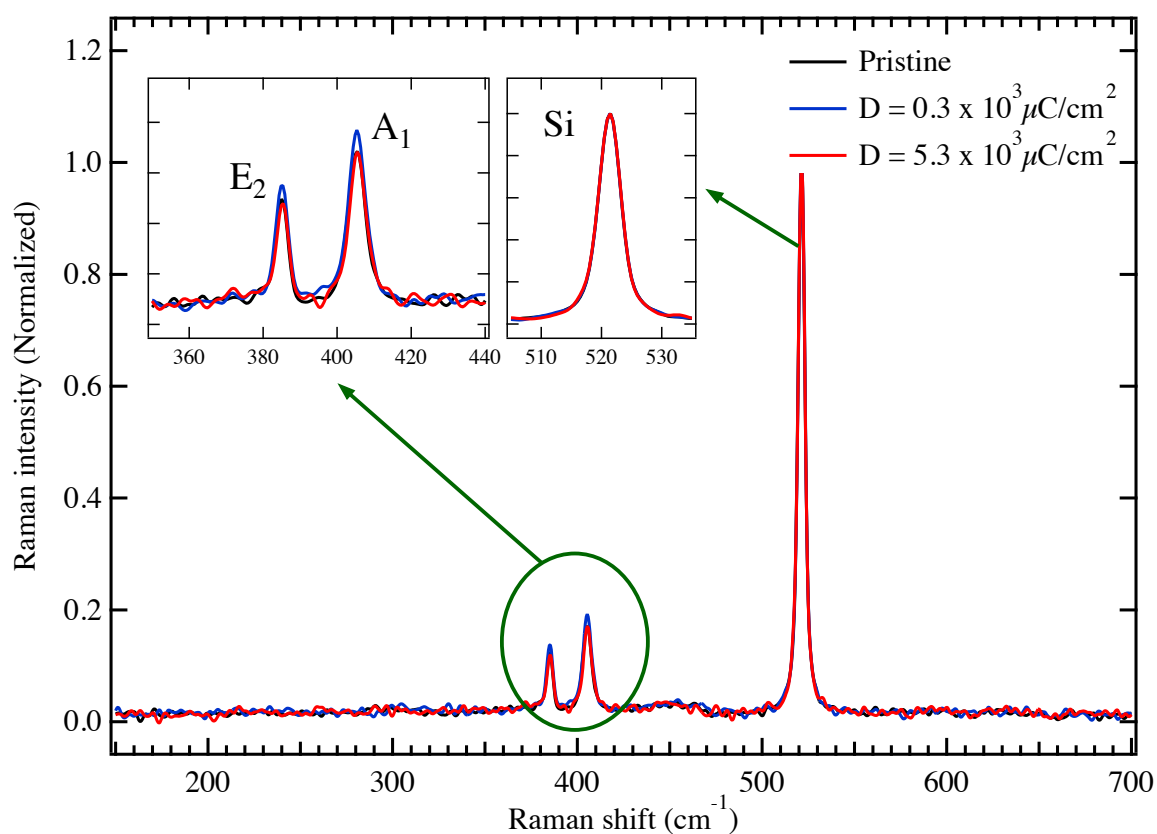

**Figure S4.** Raman spectra of monolayer MoS<sub>2</sub> with different electron irradiation doses.

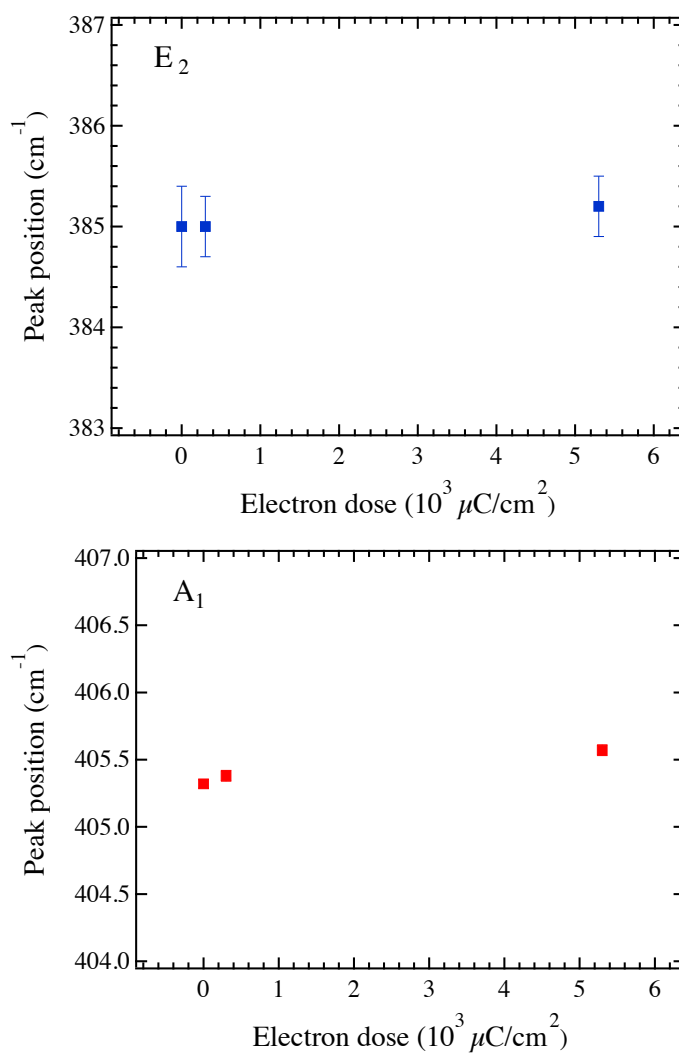

**Figure S5.** Raman peak positions of  $E_2$  and  $A_1$  modes as a function of electron dose.

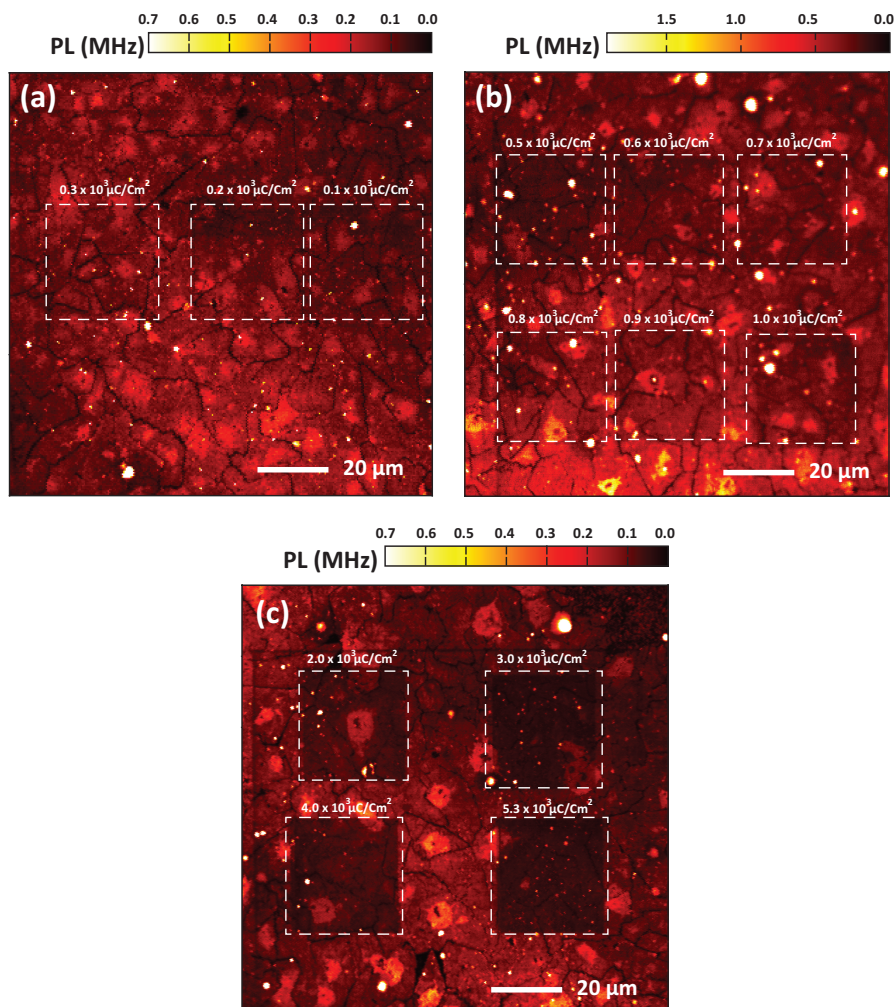

**Figure S6.** Confocal images of monolayer MoS<sub>2</sub> with electron irradiation dose variation, consisting of (a)  $D = 0.1 \times 10^3 \mu\text{C}/\text{cm}^2$ ,  $D = 0.2 \times 10^3 \mu\text{C}/\text{cm}^2$ , and  $D = 0.3 \times 10^3 \mu\text{C}/\text{cm}^2$ , (b)  $D = 0.5 \times 10^3 \mu\text{C}/\text{cm}^2$  up to  $D = 1.0 \times 10^3 \mu\text{C}/\text{cm}^2$ , and (c)  $D = 2.0 \times 10^3 \mu\text{C}/\text{cm}^2$  to  $D = 5.3 \times 10^3 \mu\text{C}/\text{cm}^2$ .

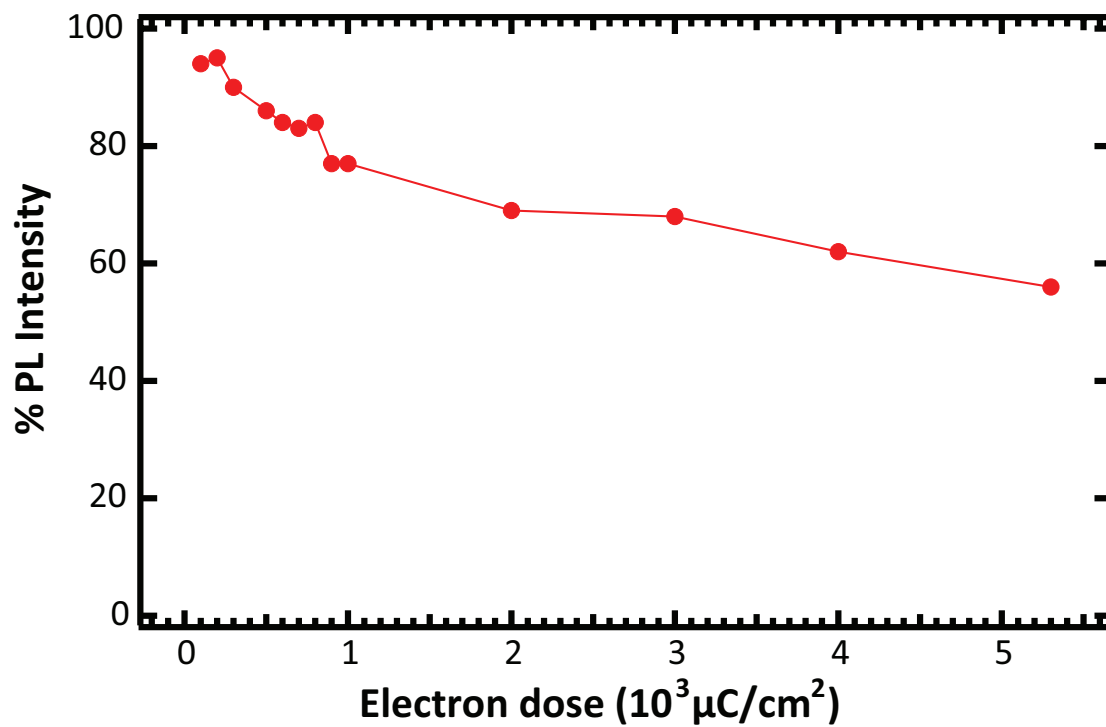

**Figure S7.** The relative PL intensity of the areas exposed by different electron irradiation dose.

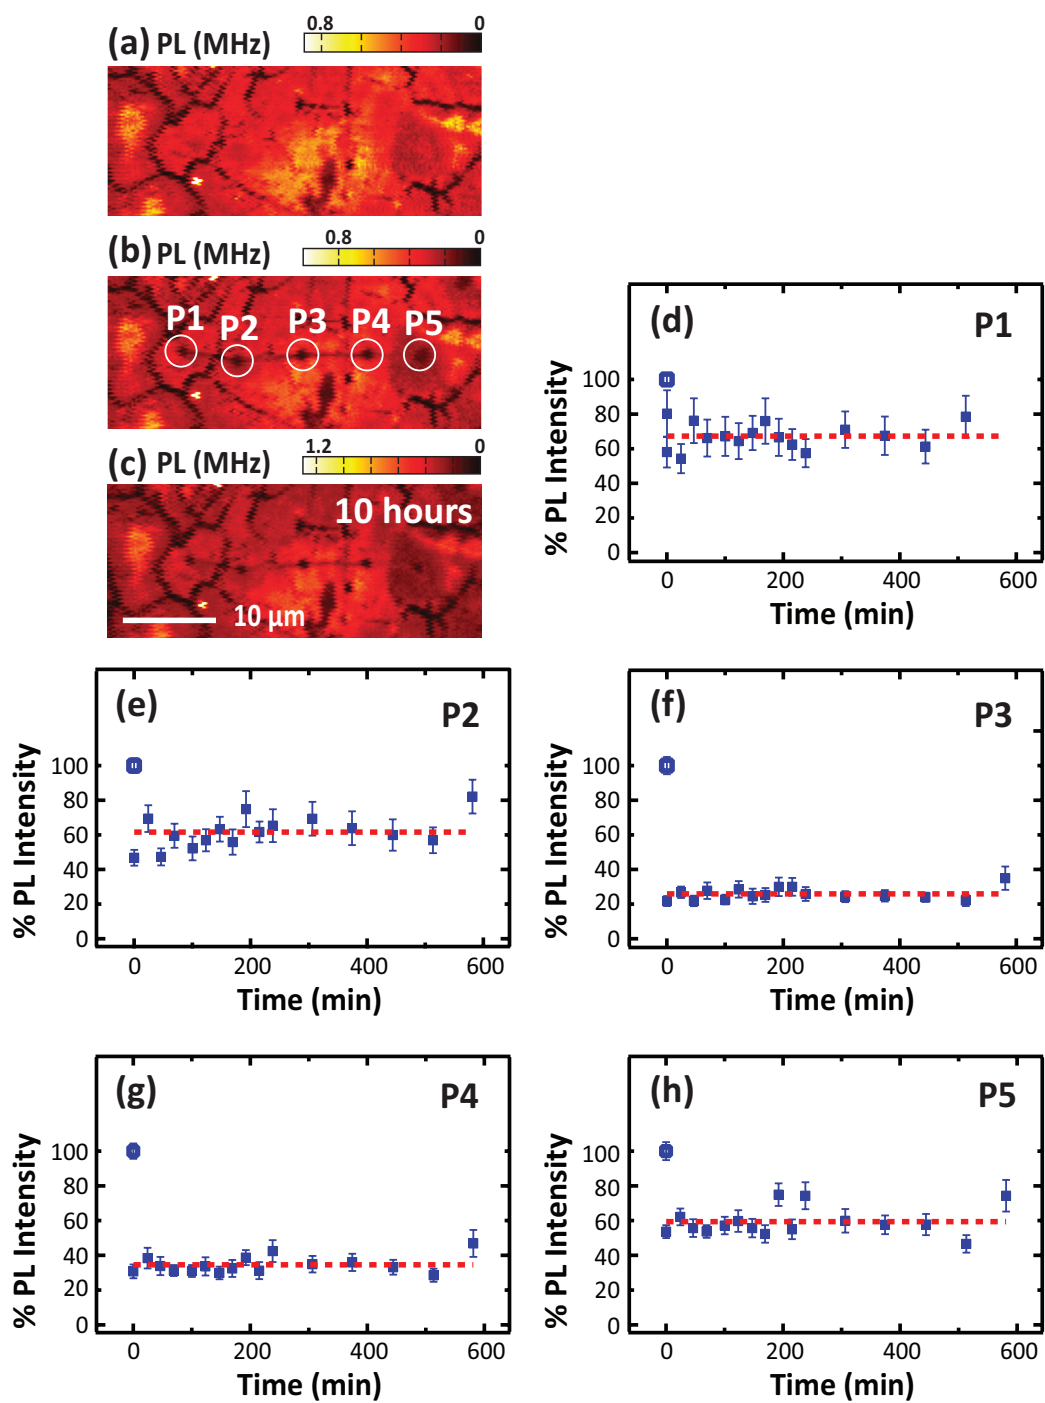

**Figure S8.** Relative PL intensity of pristine sample after high power laser exposure following by ambient atmosphere storage.

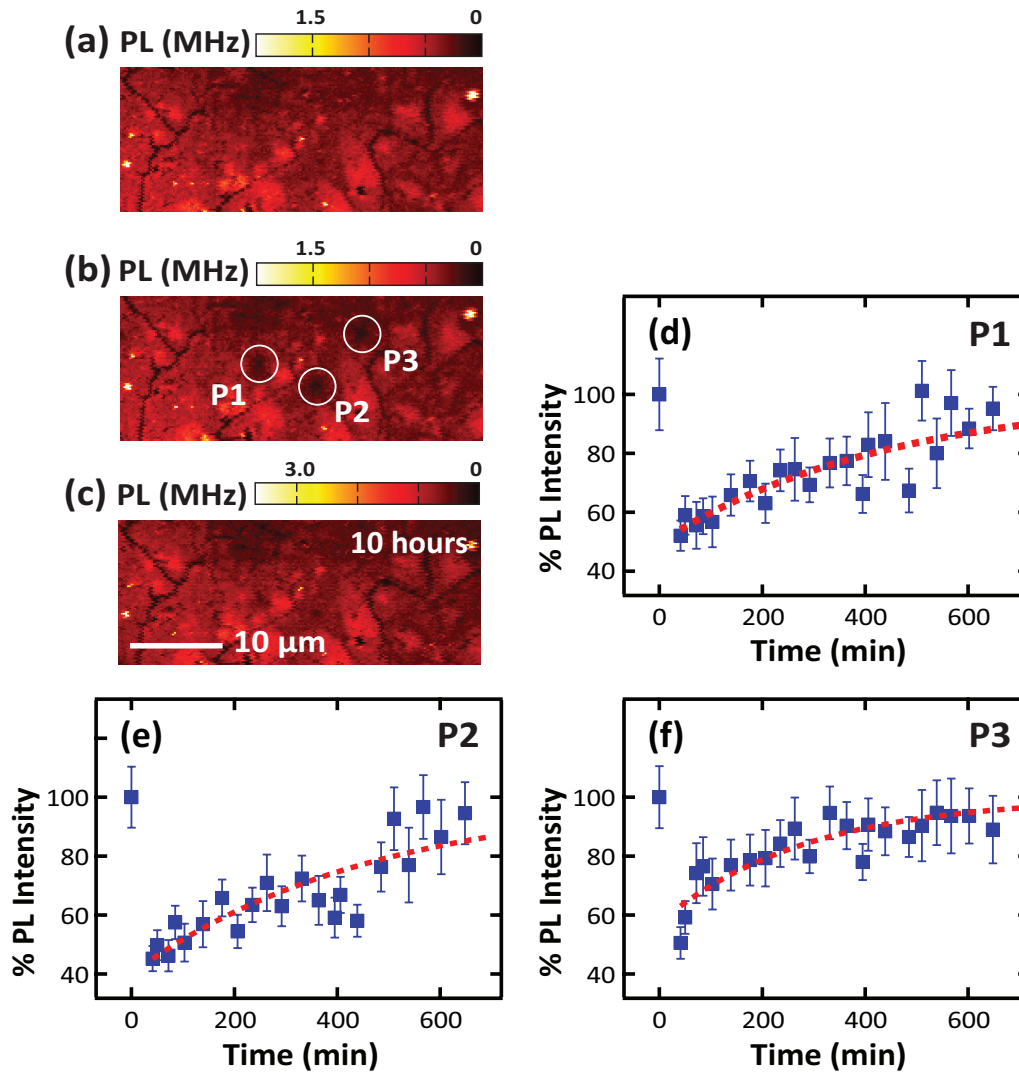

**Figure S9.** Relative PL intensity of electron dose irradiation  $D = 0.2 \times 10^3 \mu\text{C}/\text{cm}^2$  areas after high power laser exposure following by ambient atmosphere storage.

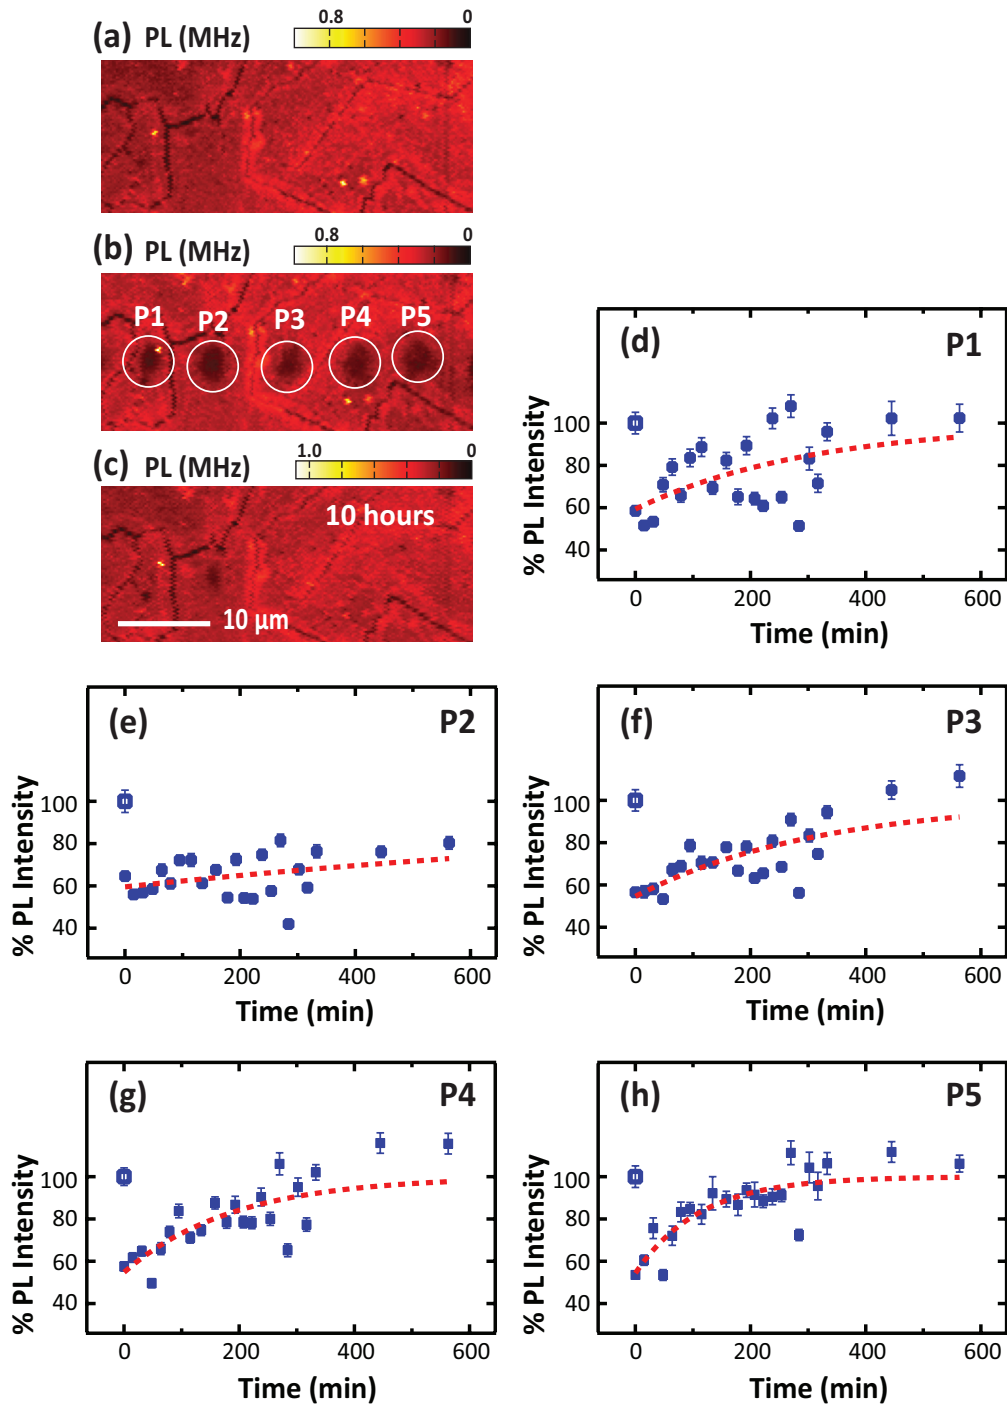

**Figure S10.** Relative PL intensity of electron dose irradiation  $D = 0.3 \times 10^3 \mu\text{C}/\text{cm}^2$  areas after high power laser exposure following by ambient atmosphere storage.



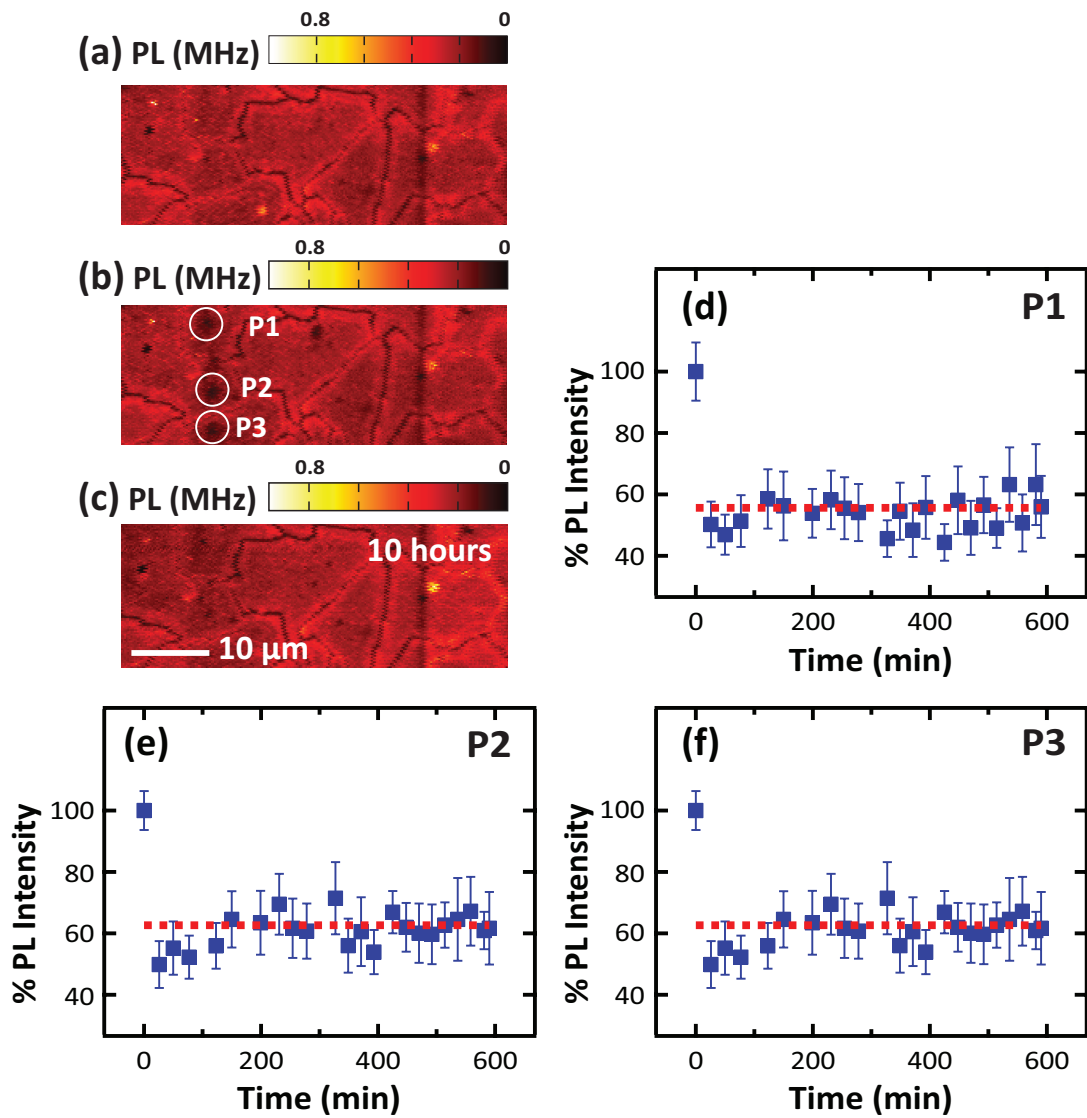

**Figure S11.** Relative PL intensity of electron dose irradiation  $D = 2.0 \times 10^3 \mu\text{C}/\text{cm}^2$  areas after high power laser exposure following by ambient atmosphere storage.

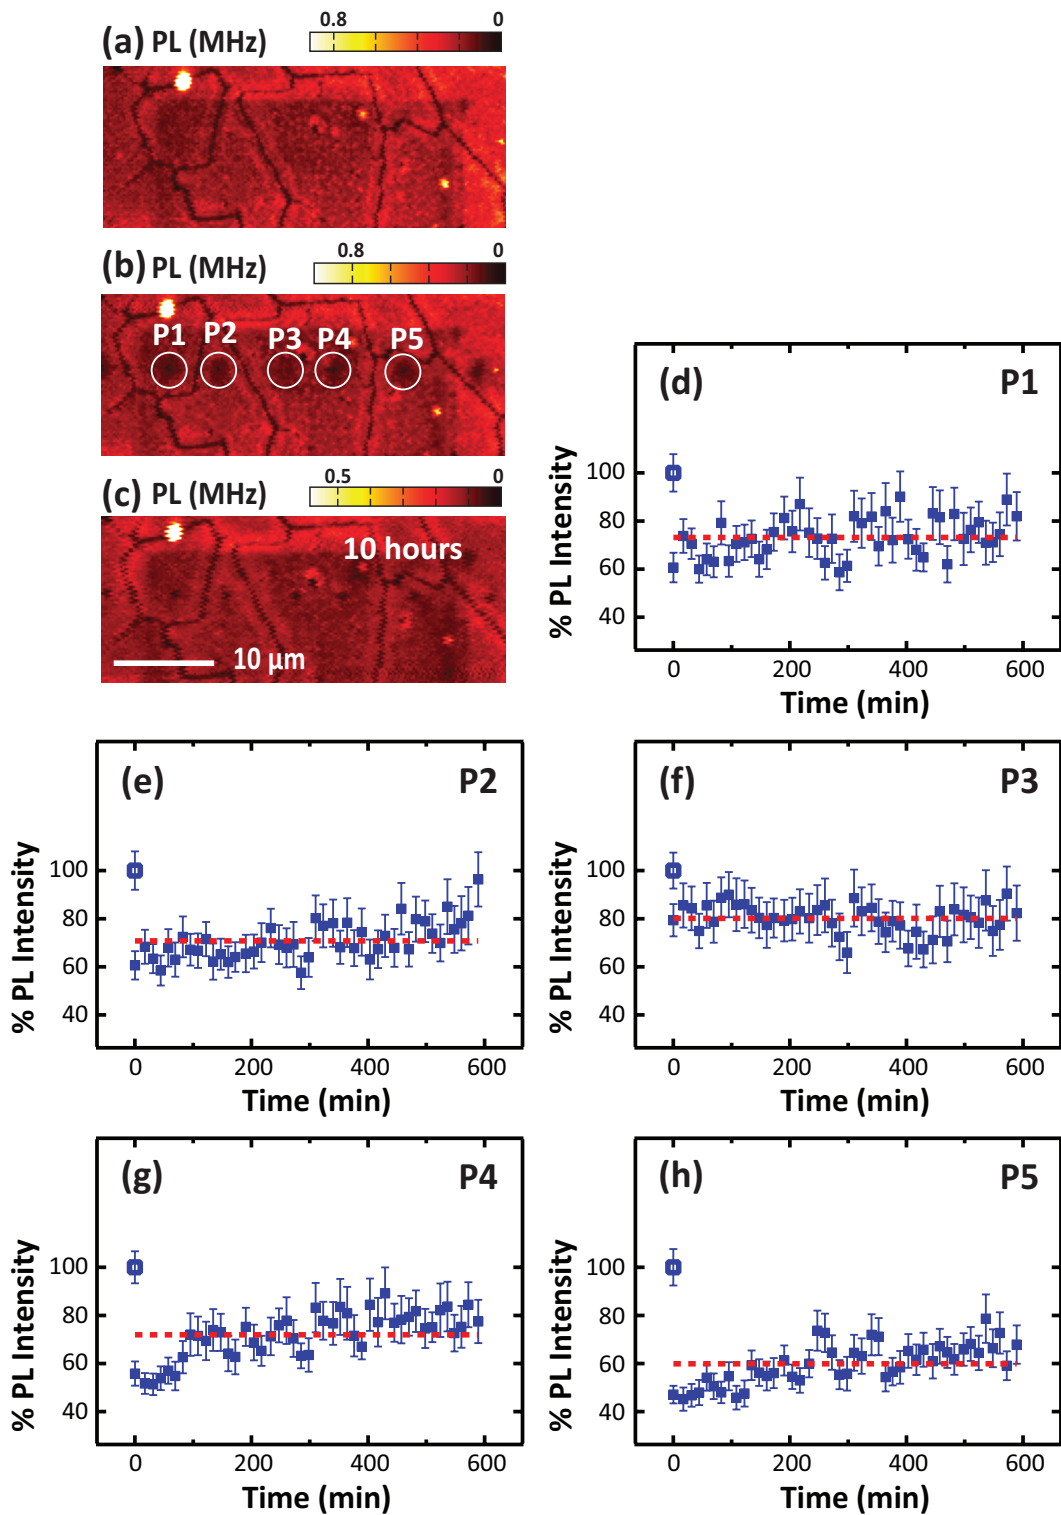

**Figure S12.** Relative PL intensity of electron dose irradiation  $D = 5.3 \times 10^3 \mu\text{C}/\text{cm}^2$  areas after high power laser exposure following by ambient atmosphere storage.

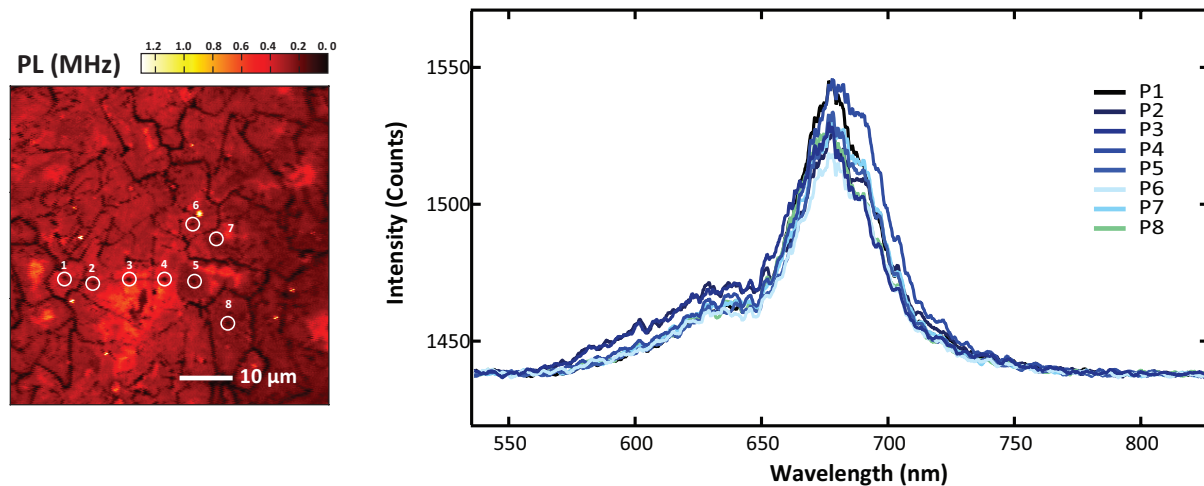

**Figure S13.** PL spectra of each point on the pristine monolayer MoS<sub>2</sub> film.

| Condition                               | Peak Area (Count·nm) |             |             |
|-----------------------------------------|----------------------|-------------|-------------|
|                                         | B exciton            | A exciton   | Trion       |
| Pristine                                | 1,874 (18%)          | 7,541 (70%) | 1,311 (12%) |
| Before the exposure of high power laser | 1,180 (12%)          | 7,000 (72%) | 1,612 (16%) |
| After the exposure of high power laser  | 398 (18%)            | 996 (46%)   | 790 (36%)   |
| Kept in N <sub>2</sub> for 10 hours     | 947 (16%)            | 2,938 (49%) | 2,102 (35%) |
| Kept in ambient for 10 hours            | 1,774 (20%)          | 6,102 (67%) | 1,203 (13%) |

**Table S1.** The relative peak area of B exciton, A exciton, and trion from the pristine sample (Fig. 2), and the low dose  $D = 0.3 \times 10^3 \mu\text{C}/\text{cm}^2$  sample that was exposed to the high-power laser (Fig. 6).
